# Supplementary material for: Icariin Prevents Amyloid Beta-Induced Apoptosis via the PI3K/Akt Pathway in PC-12 Cells
Source: Hindawi journal article supplement (doi:10.1155/2015/235265), 2015-01-01
Supplement: f1 [file 235265.f1.pdf]

I

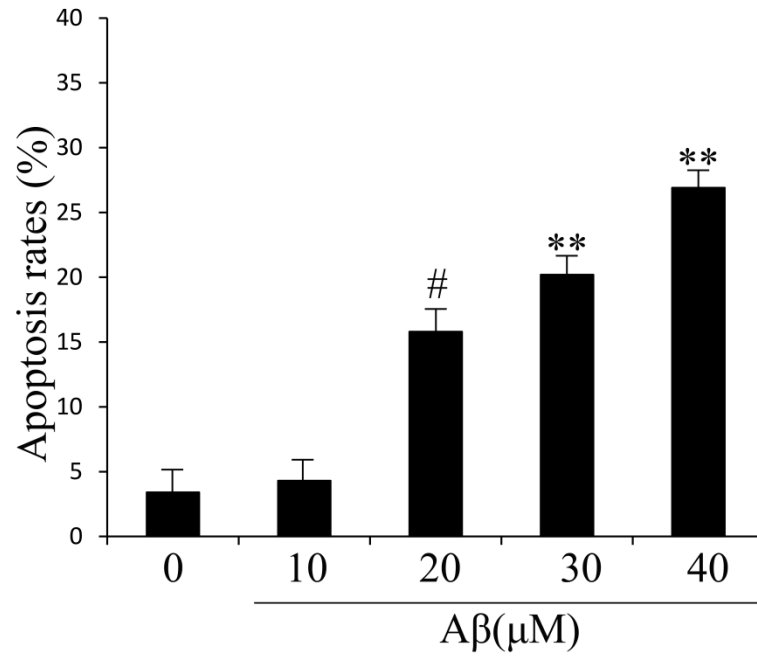

II

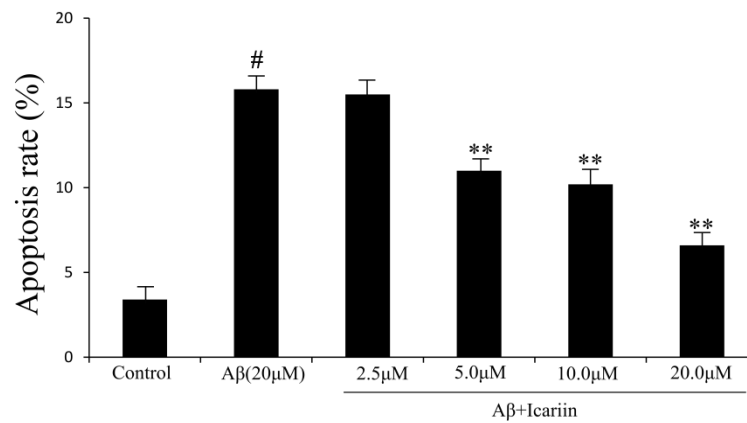

Supplementary Fig1: Protective effects of icariin against  $A\beta_{25-35}$  induced apoptosis in PC12 cells. (I) Effects of  $A\beta_{25-35}$  on cell apoptosis. PC12 cells were treated with increasing concentrations of  $A\beta_{25-35}$ , and apoptosis was evaluated by Annexin V/PI staining. (II) Protective effect of icariin against  $A\beta_{25-35}$ -induced apoptosis. PC12 cells were pretreated with icariin (2.5, 5, 10, or 20  $\mu$ M) for 1h, and then treated with 20  $\mu$ M  $A\beta_{25-35}$  for 24h. Apoptosis was evaluated by Annexin V/PI staining. Results are presented as the mean  $\pm$  S.D. of five independent experiments. \*\*p < 0.01 versus  $A\beta_{25-35}$  treatment; # p < 0.05 versus untreated control.
